# Supplementary material for: Salivary Interleukin Levels in Oral Squamous Cell Carcinoma and Oral Epithelial Dysplasia: Findings from a Sri Lankan Study
Source: MDPI journal article supplement (doi:10.3390/cancers15051510), 2023-02-28
Supplement: s1 [file s1]

## **Supplementary Data S2: Associations between salivary IL1 $\beta$ , IL6 and IL8 and risk factors in study groups**

### **Results Summary**

The associations between salivary biomarkers and smoking, alcohol, betel quid chewing, family history of cancer, mouthwash use, and co-morbidities were assessed; the results are demonstrated in Figures 1-6. We could not detect any statistically significant associations or consistent patterns between smoking, alcohol, betel quid and family history of cancer with the studied biomarkers (Supplemental Figure 1-4). Regarding the mouthwash use, in the OSCC group, mouthwash users had higher biomarker levels while in the OED group, mouthwash users had a lower biomarker level (Supplemental Figure 5). Concerning the salivary biomarker levels of patients with co-morbidities, there was a pattern where the patients with co-morbidities have a higher biomarker level compared to those who did not have any co-morbidity. The IL6 level of the co-morbid group was significantly higher ( $p=0.014$ ) compared to the patients without any co-morbidity in the OED group. Unequal and small sample sizes in risk factor sub-categories were a limitation of this analysis.

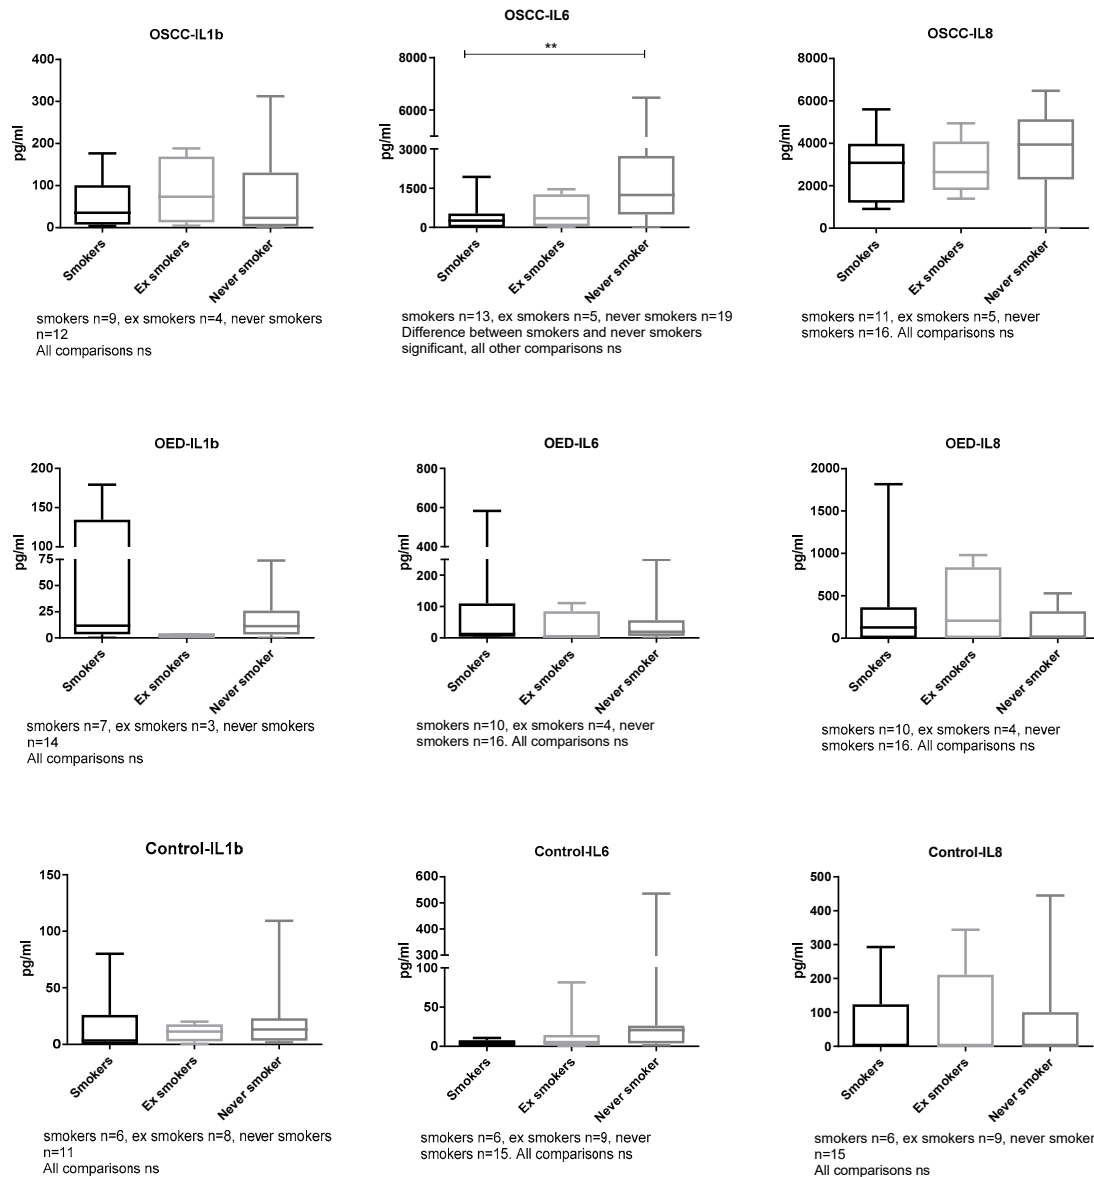

### Supplemental Figure S1: Relationships between salivary biomarkers and smoking

Box and Whisker plots, box indicate horizontal bars for median and inter-quartile range, whiskers indicate minimum and maximum values, Statistical tests were Kruskal Wallis and Dunn's test, p values < 0.05 are indicated by \*, p values < 0.01 are indicated by \*\*, ns: statistically non-significant p>0.05. **This figure indicates that IL6 level in never smokers was significantly high compared to smokers in the OSCC group. All other comparisons were statistically non-significant. There was no clear pattern of salivary biomarkers and smoking subcategories in the study groups.**

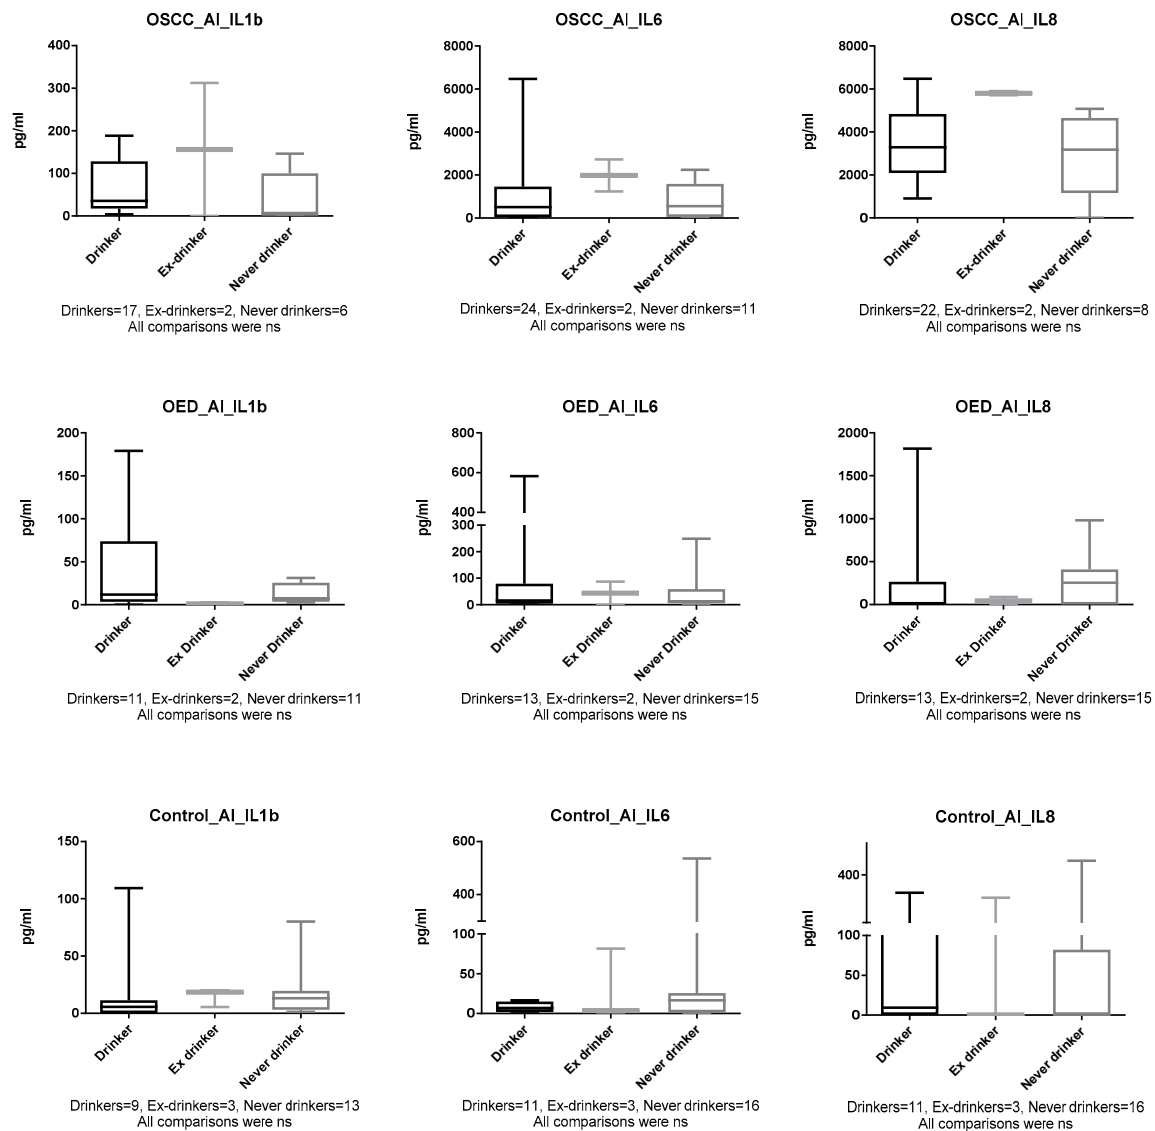

### Supplemental Figure S2: Relationships between salivary biomarkers and alcohol

Box and Whisker plots, box indicate horizontal bars for median and inter-quartile range, whiskers indicate minimum and maximum values, statistical tests were Kruskal Wallis and Dunn's test, ns: statistically non-significant  $p > 0.05$ . **There were no significant relationships or clear pattern between salivary biomarkers and alcohol habit**

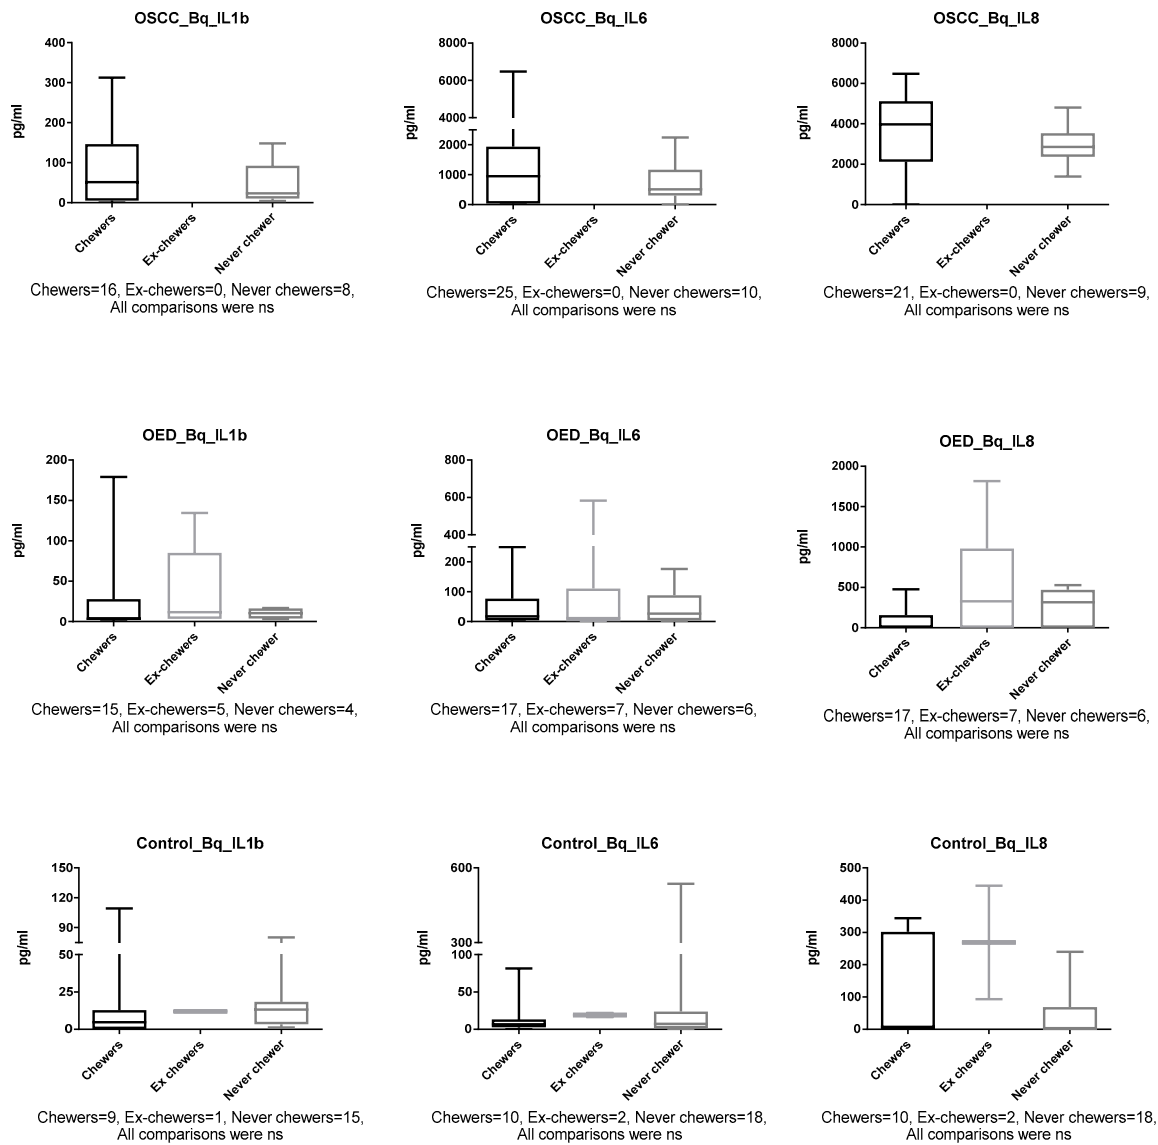

### Supplemental Figure S3: Relationships between salivary biomarkers and betel quid

Box and Whisker plots, box indicate horizontal bars for median and inter-quartile range, whiskers indicate minimum and maximum values, statistical tests were Mann Whitney U, Kruskal Wallis and Dunn's tests, ns: statistically non-significant  $p > 0.05$ . **This figure revealed that betel quid chewers in the OSCC group had high biomarker values compared to non-chewers, without statistical significance.**

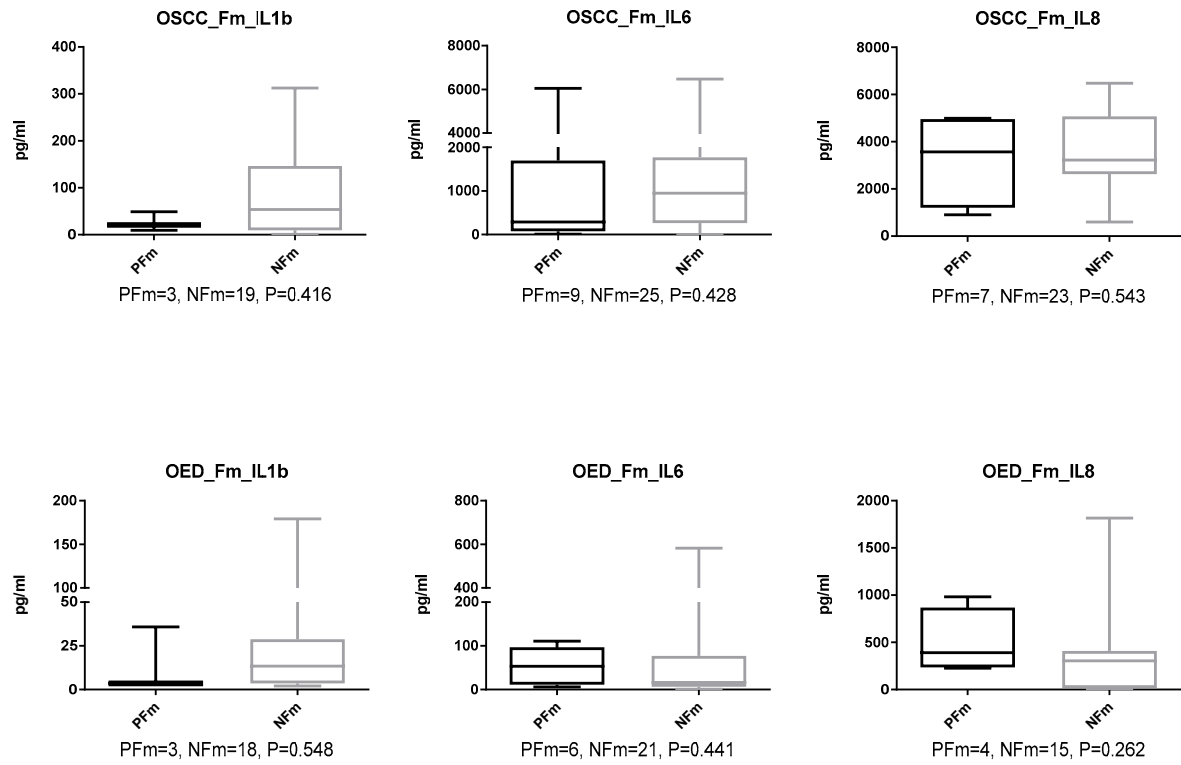

**Supplemental Figure S4: Relationships between salivary biomarkers and family history of cancer**  
Box and Whisker plots, box indicate horizontal bars for median and inter-quartile range, whiskers indicate minimum and maximum values, statistical test was Mann Whitney U test, ns: statistically non-significant  $p > 0.05$ . **There were no statistically significant differences.**

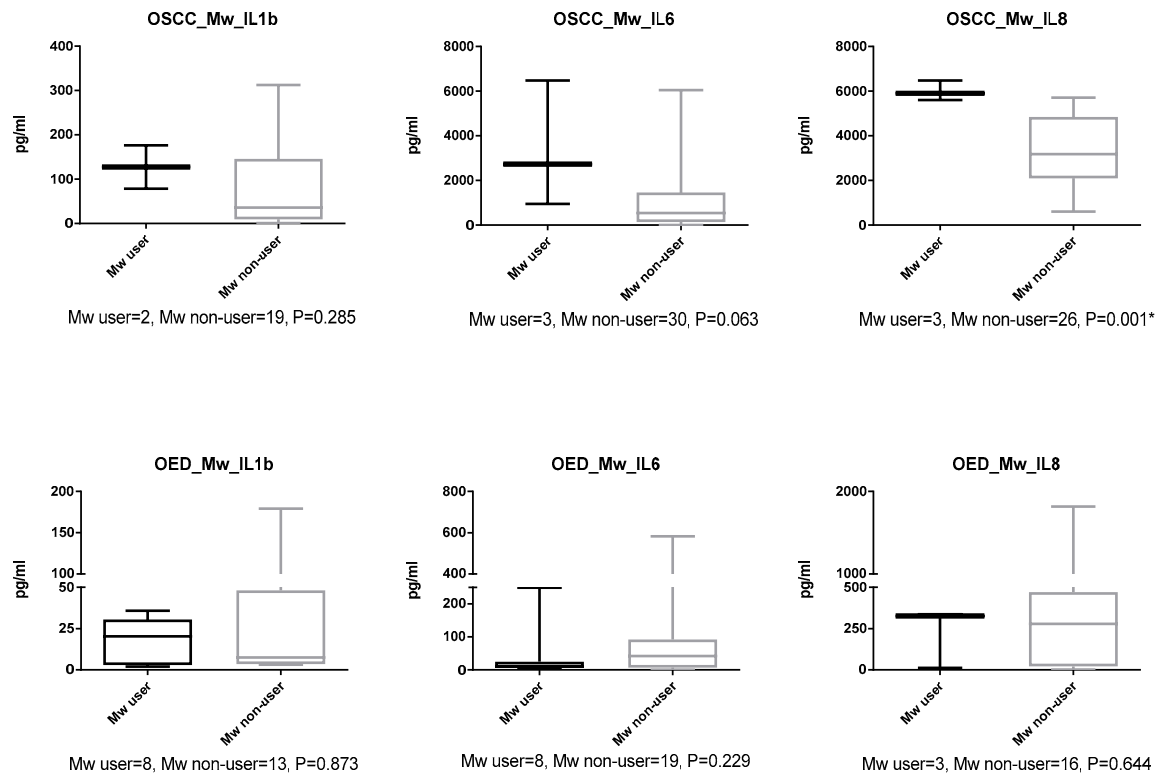

**Supplemental Figure S5: Relationships between salivary biomarkers and mouthwash use.** Box and Whisker plots, box indicate horizontal bars for median and inter-quartile range, whiskers indicate minimum and maximum values, statistical tests were Mann Whitney U tests, ns: statistically non-significant  $p > 0.05$ . **In the OSCC group, MW users had higher biomarker levels while in the OED group, MW users had a lower biomarker level.**

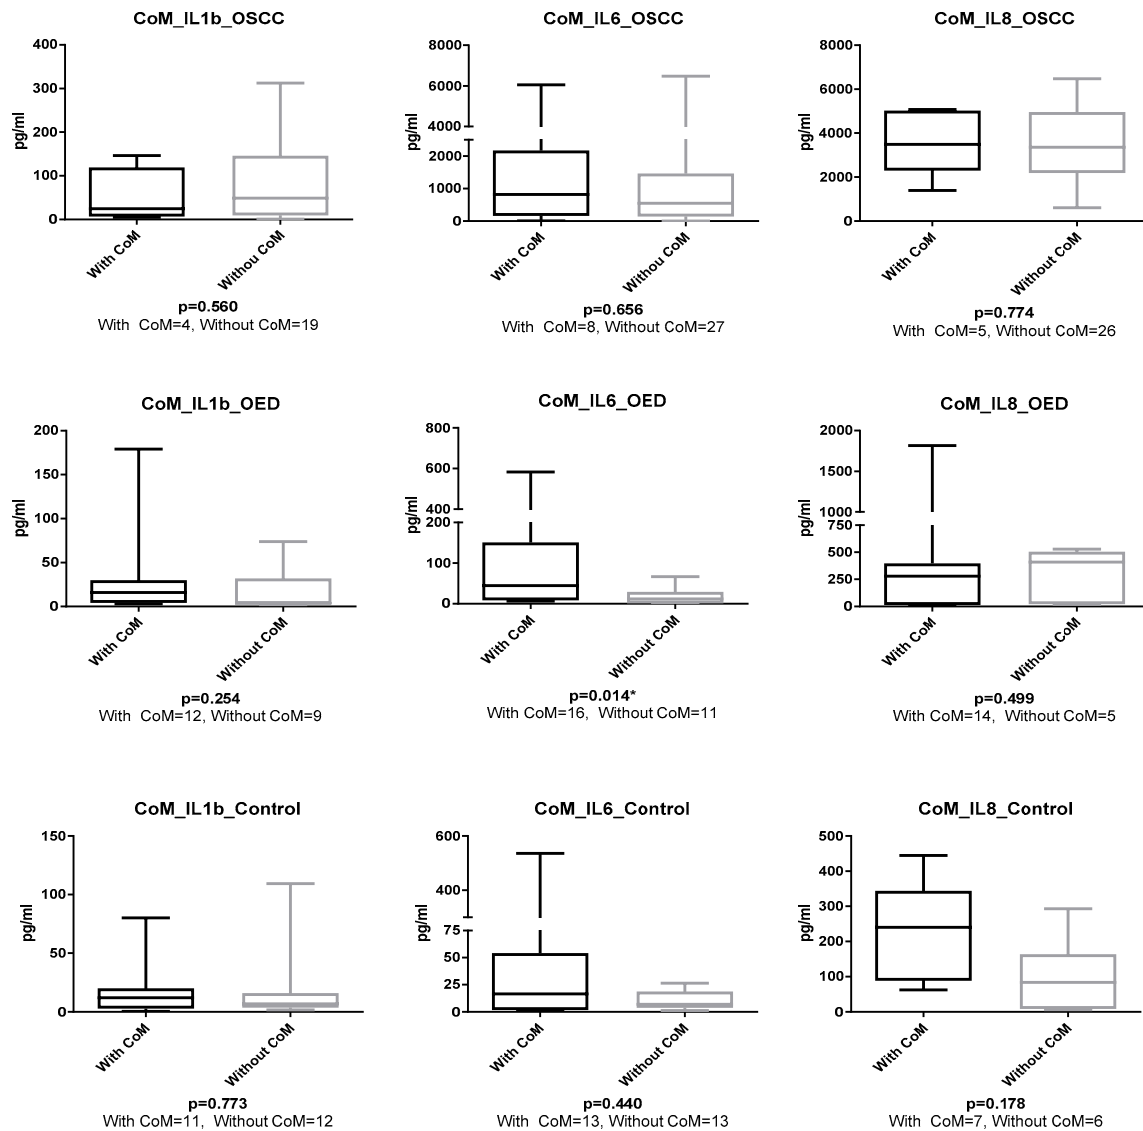

**Figure S6: Relationships between salivary biomarkers and co-morbidities.** Box and Whisker plots, box indicate horizontal bars for median and inter-quartile range, whiskers indicate minimum and maximum values, statistical test was Mann Whitney U test, \*statistically significant  $p < 0.05$ . **Group with co-morbidities had a higher biomarker level, the IL6 level of the co-morbid group was significantly higher compared to the patients without any co-morbidity in the OED group.**
