# Supplementary material for: Salivary Interleukin Levels in Oral Squamous Cell Carcinoma and Oral Epithelial Dysplasia: Findings from a Sri Lankan Study
Source: MDPI journal article supplement (doi:10.3390/cancers15051510), 2023-02-28
Supplement: s1 [file s1]

**Supplementary Data S1: Raw data values for salivary biomarkers in the study participants**

| Age | Sex    | Group   | IL1B (pg/ml) | IL6(pg/ml) | IL8 (pg/ml) |
|-----|--------|---------|--------------|------------|-------------|
| 70  | male   | Control | 18.38        | 1.61       | 0           |
| 49  | male   | Control | 4.72         | 12.4       | 0           |
| 78  | male   | Control | 12.04        | 16.53      | 93.55       |
| 36  | male   | Control | 23.04        | 3.27       | 0           |
| 68  | male   | Control | 7.99         | 10.73      | 0           |
| 71  | male   | Control | 13.17        | 92.43      | 88.7        |
| 66  | female | Control | 30.95        | 26.81      | 62.12       |
| 71  | male   | Control | 3.36         | 4.09       | 0           |
| 64  | male   | Control | 15.55        | 0          | 0           |
| 65  | female | Control | 2.78         | 20.7       | 0           |
| 69  | male   | Control | 0.38         | 6.69       | 0           |
| 47  | male   | Control | 0            | 6.92       | 0           |
| 48  | male   | Control | 0            | 0          | 292.98      |
| 43  | male   | Control | 1.69         | 26.45      | 0           |
| 57  | male   | Control | 80.16        | 0          | 0           |
| 69  | female | Control | 15.46        | 23.08      | 120.58      |
| 70  | male   | Control | 16.08        | 1.28       | 0           |
| 59  | male   | Control | 109.27       | 15.62      | 9.2         |
| 57  | male   | Control | 1.93         | 5.26       | 6.24        |
| 61  | male   | Control | NT           | 14.81      | 240.26      |
| 54  | female | Control | NT           | 21.89      | 100.51      |
| 63  | female | Control | NT           | 21.82      | 444.76      |
| 65  | male   | Control | NT           | 535.88     | 0           |
| 69  | male   | Control | NT           | 0          | 343.82      |
| 59  | male   | Control | 5.38         | 3.71       | 0           |
| 69  | male   | Control | 10.61        | 1.88       | 0           |
| 72  | female | Control | 6.82         | 1.84       | 0           |
| 55  | male   | Control | 5.72         | 6.92       | 67.56       |
| 63  | male   | Control | 1.25         | 1.37       | 0           |
| 79  | male   | Control | 20.01        | 81.49      | 328.29      |
| 51  | male   | OSCC    | NT           | 7.78       | NT          |
| 53  | male   | OSCC    | 35.58        | 6.08       | 3592.99     |
| 56  | male   | OSCC    | 84.85        | 55.45      | 3637.81     |

|    |        |      |        |         |         |
|----|--------|------|--------|---------|---------|
| 70 | male   | OSCC | NT     | 1127.75 | 2031.66 |
| 75 | female | OSCC | NT     | 2243.48 | NT      |
| 67 | male   | OSCC | 0      | 3.48    | 0       |
| 67 | male   | OSCC | 78.35  | 6473.53 | 6473.53 |
| 64 | male   | OSCC | 312.59 | 1237.97 | 5707.18 |
| 56 | male   | OSCC | 148.03 | 402.33  | 4805.16 |
| 69 | female | OSCC | NT     | 1588.57 | 3138.29 |
| 52 | male   | OSCC | 4.94   | 99.47   | 3221.61 |
| 68 | male   | OSCC | NT     | 260.55  | 907.32  |
| 63 | male   | OSCC | NT     | 6047.34 | 4956.42 |
| 58 | male   | OSCC | NT     | 1933.34 | NT      |
| 67 | male   | OSCC | 35.93  | 354.92  | 1389.03 |
| 42 | female | OSCC | 0.96   | 12.63   | 601.83  |
| 55 | male   | OSCC | 20.96  | 1456.31 | 2112    |
| 51 | male   | OSCC | 9.52   | 288.57  | 1204.17 |
| 43 | male   | OSCC | 111.03 | 1065.15 | 2644.85 |
| 33 | female | OSCC | 9.45   | 607.31  | 2856.18 |
| 66 | male   | OSCC | 48.75  | 10.69   | 3975.73 |
| 73 | male   | OSCC | 0      | 2731.28 | 5902.5  |
| 72 | male   | OSCC | NT     | 7.54    | 2219.35 |
| 61 | male   | OSCC | 13.72  | 495.59  | 3492.23 |
| 76 | male   | OSCC | NT     | 175.55  | NT      |
| 78 | female | OSCC | NT     | 1942.99 | NT      |
| 41 | male   | OSCC | 176.6  | 950.15  | 5604.1  |
| 65 | male   | OSCC | 146.47 | 1140.94 | 5075.13 |
| 70 | male   | OSCC | 25.36  | 3377.53 | 5157.18 |
| 42 | male   | OSCC | 5.64   | 0       | 1113.1  |
| 76 | male   | OSCC | 145.99 | 4245.55 | 4245.55 |
| 47 | male   | OSCC | 53.82  | 538.41  | 2821.66 |
| 73 | male   | OSCC | 4.32   | 0       | 2633.22 |
| 58 | male   | OSCC | 188.56 | 1462.14 | 4945.06 |
| 52 | female | OSCC | NT     | 552.81  | 4997.76 |
| 56 | male   | OSCC | 25.84  | 529.05  | 3086.24 |
| 55 | male   | OSCC | NT     | 146.17  | 3572.19 |
| 56 | female | OED  | 15.05  | 6.16    | 0       |
| 61 | male   | OED  | 134.51 | 582.63  | 1816.28 |
| 30 | male   | OED  | 3.39   | 3.76    | 0       |
| 36 | male   | OED  | 25.59  | 12.65   | 12.59   |

|    |        |     |        |        |        |
|----|--------|-----|--------|--------|--------|
| 58 | male   | OED | 0      | 1.44   | 0      |
| 72 | male   | OED | 7.52   | 41.94  | 15.03  |
| 41 | female | OED | 6.16   | 0      | 378.2  |
| 66 | male   | OED | NT     | 7.57   | 326.71 |
| 40 | male   | OED | NT     | 66.66  | 478.1  |
| 53 | female | OED | NT     | 58.83  | 528.98 |
| 54 | male   | OED | NT     | 0      | 409.32 |
| 58 | female | OED | NT     | 47.28  | 254.22 |
| 60 | male   | OED | NT     | 91.95  | 226.46 |
| 70 | male   | OED | 3.5    | 110.71 | 980.12 |
| 60 | male   | OED | 11.71  | 11.96  | 25.49  |
| 69 | male   | OED | 2.06   | 0      | 0      |
| 29 | male   | OED | 2.82   | 5.91   | 0      |
| 60 | male   | OED | 73.93  | 17.69  | 19.95  |
| 80 | male   | OED | 16.73  | 6.53   | 0      |
| 66 | male   | OED | 0      | 6.83   | 1.35   |
| 55 | male   | OED | 179.16 | 163.75 | 303.87 |
| 46 | female | OED | 3.13   | 176.01 | 452.07 |
| 67 | male   | OED | 0      | 87.29  | 86.93  |
| 57 | male   | OED | 3.39   | 0.96   | 0      |
| 55 | male   | OED | 3.5    | 0.74   | 0      |
| 52 | male   | OED | 35.8   | 12.59  | 0      |
| 72 | male   | OED | 27.93  | 29.05  | 0      |
| 59 | female | OED | 31.3   | 249.29 | 337.6  |
| 45 | male   | OED | 3.6    | 16.15  | 0      |
| 59 | male   | OED | 22.41  | 21.57  | 3.77   |

NT= Data not obtained, 0 = Indicates samples that had an absorbance reading equivalent to or lower than the absorbance value of the Blank.
